# Supplementary material for: Effectiveness and Safety of Off-label Dosing of Non–vitamin K Antagonist Anticoagulant for Atrial Fibrillation in Asian Patients
Source: PubMed Central journal article supplement (PMC7000392; doi:10.1038/s41598-020-58665-5), 2020-02-04

**Effectiveness and Safety of Off-label Dosing of Non-vitamin K Antagonist Anticoagulant for Atrial Fibrillation in Asian Patients**

Kwang-No Lee, MD<sup>1</sup>; Jong-Il Choi, MD, PhD, MHSc<sup>1,\*</sup>; Ki Yung Boo, MD<sup>1</sup>; Do Young Kim, MD<sup>1</sup>; Yun Gi Kim, MD<sup>1</sup>; Suk-Kyu Oh, MD<sup>1</sup>; Yong-Soo Baek, MD<sup>2</sup>; Dae In Lee, MD<sup>3</sup>; Seung-Young Roh, MD<sup>1</sup>; Jaemin Shim, MD, PhD<sup>1</sup>; Jin Seok Kim, MD, PhD<sup>1</sup>; Young-Hoon Kim, MD, PhD<sup>1</sup>

<sup>1</sup>Division of Cardiology, Department of Internal Medicine, Korea University College of Medicine and Korea University Medical Center, Seoul, Republic of Korea; <sup>2</sup>Division of Cardiology, Department of Internal Medicine, Inha University Hospital, Incheon, Republic of Korea; <sup>3</sup>Division of Cardiology, Department of Internal Medicine, Chungbuk National University Hospital, Cheongju, Republic of Korea

\*Corresponding author: +82-2-920-5445, [jongilchoi@korea.ac.kr](mailto:jongilchoi@korea.ac.kr), Korea University Anam hospital, 73 Goryeodae-ro, Seongbuk-gu, Seoul 02841, Republic of Korea.

Supplementary Table S1. Dosage and administration of non-vitamin K antagonist anticoagulants and approval dates by the Korean Ministry of Food and Drug Safety to prevent stroke and systemic embolism associated with non-valvular atrial fibrillation

| Drug              | Approval date | Dosage and administration*                                                                                                                                                                                                                                                                                                       |
|-------------------|---------------|----------------------------------------------------------------------------------------------------------------------------------------------------------------------------------------------------------------------------------------------------------------------------------------------------------------------------------|
| Dabigatran 110 mg | Feb. 18, 2011 | 110 mg twice daily<br><ul style="list-style-type: none"> <li>- <math>30 \leq</math> serum creatinine clearance (sCCr) <math>&lt; 50</math> mL/min</li> <li>- body weight <math>\leq 50</math> kg</li> <li>- age <math>\geq 75</math> years</li> <li>- concomitant potent P-glycoprotein inhibitor therapy<sup>†</sup></li> </ul> |
| Dabigatran 150 mg | Feb. 18, 2011 | 150 mg twice daily, standard dose                                                                                                                                                                                                                                                                                                |
| Rivaroxaban 15 mg | Mar. 6, 2012  | 15 mg once daily<br><ul style="list-style-type: none"> <li>- <math>15 \leq</math> sCCr <math>&lt; 50</math> mL/min</li> </ul>                                                                                                                                                                                                    |
| Rivaroxaban 20 mg | Mar. 6, 2012  | 20 mg once daily, standard dose                                                                                                                                                                                                                                                                                                  |
| Apixaban 2.5 mg   | Jan. 8, 2013  | 2.5 mg twice daily<br><ul style="list-style-type: none"> <li>- any 2 of age <math>\geq 80</math> years, body weight <math>\leq 60</math> kg, or serum creatinine <math>\geq 1.5</math> mg/dL</li> <li>- <math>15 \leq</math> sCCr <math>&lt; 30</math> mL/min</li> </ul>                                                         |

|                |               |                                                                    |
|----------------|---------------|--------------------------------------------------------------------|
| Apixaban 5 mg  | Feb. 27, 2013 | 5 mg twice daily, standard dose                                    |
| Edoxaban 30 mg | Aug. 25, 2015 | 30 mg once daily                                                   |
|                |               | - $15 \leq \text{sCCr} < 50 \text{ mL/min}$                        |
|                |               | - body weight $\leq 60 \text{ kg}$                                 |
|                |               | - concomitant potent P-glycoprotein inhibitor therapy <sup>†</sup> |
| Edoxaban 60 mg | Aug. 25, 2015 | 60 mg once daily, standard dose                                    |

---

\* based on randomized controlled trials except for dabigatran.

† included verapamil, cyclosporin, tacrolimus, dronedarone, and itraconazole in this study.

‡ included cyclosporin, tacrolimus, dronedarone, and itraconazole in this study.

Supplementary Table S2. Incidence rate and hazard ratio for thromboembolism and major bleeding compared with the all warfarin group

|                 | Incidence rate<br>(% patients/year) | vs. All warfarin       |          |                       |                    |
|-----------------|-------------------------------------|------------------------|----------|-----------------------|--------------------|
|                 |                                     | Unadjusted HR (95% CI) | <i>p</i> | Adjusted HR (95% CI)* | <i>p</i>           |
| Thromboembolism | 1.34                                |                        |          |                       |                    |
| All warfarin    | 1.35                                | reference              | –        | reference             | –                  |
| All NOAC        | 1.52                                | 1.04 (0.65–1.64)       | 0.883    | 1.31 (0.81–2.12)      | 0.273              |
| Reduced dose    | 2.32                                | 1.61 (0.96–2.71)       | 0.069    | 1.55 (0.89–2.68)      | 0.122              |
| On-label use    | 1.94                                | 1.34 (0.68–2.64)       | 0.403    | 1.12 (0.54–2.31)      | 0.760              |
| Off-label use   | 2.73                                | 1.84 (0.97–3.50)       | 0.063    | 2.51 (1.28–4.93)      | 0.008              |
| Standard dose   | 0.92                                | 0.61 (0.32–1.15)       | 0.125    | 0.98 (0.48–1.99)      | 0.952              |
| On-label use    | 1.05                                | 0.70 (0.37–1.32)       | 0.270    | 1.20 (0.58–2.49)      | 0.621              |
| Off-label use   | 0.00                                | 0.05 (0.00–30.86)      | 0.353    | 1.06 (0.23–4.89)      | 0.944 <sup>†</sup> |
| Major bleeding  | 1.59                                |                        |          |                       |                    |
| All warfarin    | 2.14                                | reference              | –        | reference             | –                  |
| All NOAC        | 1.20                                | 0.49 (0.31–0.77)       | 0.002    | 0.53 (0.32–0.88)      | 0.015              |

|               |      |                  |       |                  |       |
|---------------|------|------------------|-------|------------------|-------|
| Reduced dose  | 1.29 | 0.54 (0.30–0.97) | 0.039 | 0.45 (0.23–0.87) | 0.018 |
| On-label use  | 1.23 | 0.52 (0.24–1.15) | 0.107 | 0.31 (0.12–0.81) | 0.016 |
| Off-label use | 1.46 | 0.59 (0.27–1.31) | 0.197 | 0.73 (0.31–1.71) | 0.467 |
| Standard dose | 1.13 | 0.46 (0.26–0.81) | 0.007 | 0.65 (0.33–1.28) | 0.216 |
| On-label use  | 0.89 | 0.36 (0.19–0.69) | 0.002 | 0.57 (0.26–1.24) | 0.158 |
| Off-label use | 3.88 | 1.59 (0.63–3.98) | 0.326 | 0.99 (0.30–3.25) | 0.987 |

---

\* adjusted for age, sex, hypertension, diabetes mellitus, congestive heart failure, prior thromboembolism, concomitant antiplatelet drugs, serum creatinine clearance, and left atrial anteroposterior diameter.

† Firth's bias reduction method was used because of sparse data.

Supplementary Table S3. Incidence rate and hazard ratio for thromboembolism and major bleeding compared with the well-controlled warfarin group

|                               | Incidence rate<br>(% patients/year) | vs. Warfarin with TTR $\geq 60\%$ |          |                       |                    |
|-------------------------------|-------------------------------------|-----------------------------------|----------|-----------------------|--------------------|
|                               |                                     | Unadjusted HR (95% CI)            | <i>p</i> | Adjusted HR (95% CI)* | <i>p</i>           |
| Thromboembolism               | 1.34                                |                                   |          |                       |                    |
| Warfarin with TTR $\geq 60\%$ | 0.92                                | reference                         | –        | reference             | –                  |
| All NOAC                      | 1.52                                | 1.36 (0.59–3.10)                  | 0.471    | 1.72 (0.74–3.97)      | 0.206              |
| Reduced dose                  | 2.32                                | 2.25 (0.94–5.42)                  | 0.070    | 2.14 (0.85–5.42)      | 0.107              |
| On-label use                  | 1.94                                | 1.79 (0.65–4.90)                  | 0.258    | 1.99 (0.61–6.46)      | 0.251              |
| Off-label use                 | 2.73                                | 2.50 (0.93–6.73)                  | 0.070    | 3.12 (1.12–8.67)      | 0.029              |
| Standard dose                 | 0.92                                | 0.75 (0.29–1.98)                  | 0.565    | 1.22 (0.42–3.55)      | 0.711              |
| On-label use                  | 1.05                                | 0.87 (0.33–2.28)                  | 0.773    | 1.47 (0.49–4.40)      | 0.491              |
| Off-label use                 | 0.00                                | 0.03 (0.00–232.19)                | 0.450    | 1.08 (0.06–18.65)     | 0.960 <sup>†</sup> |
| Major bleeding                | 1.59                                |                                   |          |                       |                    |
| Warfarin with TTR $\geq 60\%$ | 1.15                                | reference                         | –        | reference             | –                  |

|               |      |                   |       |                   |       |
|---------------|------|-------------------|-------|-------------------|-------|
| All NOAC      | 1.20 | 1.27 (0.52–3.15)  | 0.600 | 1.32 (0.50–3.51)  | 0.574 |
| Reduced dose  | 1.29 | 1.47 (0.51–4.20)  | 0.473 | 1.30 (0.41–4.13)  | 0.653 |
| On-label use  | 1.23 | 1.55 (0.46–5.23)  | 0.476 | 1.16 (0.26–5.13)  | 0.842 |
| Off-label use | 1.46 | 1.67 (0.49–5.67)  | 0.413 | 2.24 (0.62–8.17)  | 0.221 |
| Standard dose | 1.13 | 1.34 (0.48–3.72)  | 0.572 | 1.72 (0.54–5.47)  | 0.359 |
| On-label use  | 0.89 | 0.93 (0.31–2.80)  | 0.902 | 1.43 (0.41–5.05)  | 0.574 |
| Off-label use | 3.88 | 6.16 (1.60–23.62) | 0.008 | 4.53 (0.76–27.08) | 0.098 |

---

\* Adjusted factors were the same as given in Supplemental Table S2.

† Firth's bias reduction method was used because of sparse data.

Supplementary Table S4. Sensitivity analysis of incidence rate and hazard ratios for thromboembolism and major bleeding

|                        | vs. All warfarin      |                    | vs. Warfarin with TTR $\geq$ 60% |                    |
|------------------------|-----------------------|--------------------|----------------------------------|--------------------|
|                        | Adjusted HR (95% CI)* | <i>p</i>           | Adjusted HR (95% CI)*            | <i>p</i>           |
| <b>Thromboembolism</b> |                       |                    |                                  |                    |
| ON-R                   | 0.93 (0.38–2.31)      | 0.877              | 1.94 (0.47–7.96)                 | 0.358              |
| OFF-R                  | 2.37 (1.26–4.49)      | 0.008              | 3.19 (1.15–8.84)                 | 0.026              |
| ON-S                   | 1.15 (0.55–2.37)      | 0.712              | 1.42 (0.48–4.27)                 | 0.527              |
| OFF-S                  | 1.14 (0.24–5.34)      | 0.866 <sup>†</sup> | 1.26 (0.07–21.41)                | 0.874 <sup>†</sup> |
| <b>Major bleeding</b>  |                       |                    |                                  |                    |
| ON-R                   | 0.28 (0.09–0.93)      | 0.037              | 1.00 (0.19–5.31)                 | 0.996              |
| OFF-R                  | 0.55 (0.23–1.31)      | 0.176              | 1.78 (0.47–6.71)                 | 0.395              |
| ON-S                   | 0.60 (0.29–1.27)      | 0.183              | 1.48 (0.44–5.01)                 | 0.529              |
| OFF-S                  | 0.87 (0.21–3.69)      | 0.853              | 3.79 (0.50–28.67)                | 0.197              |

\* Adjusted factors were the same as given in Supplemental Table S2.

<sup>†</sup> Firth's bias reduction method was used because of sparse data.



Supplementary Figure S1. Sensitivity analysis. Forest plot of adjusted hazard ratios and 95% confidence intervals for thromboembolism (a) and major bleeding (b) in the NOAC group compared with the warfarin group. TTR  $\geq 60\%$  was defined as well-controlled. The adjusted factors were the same as given in Supplemental Table S2.

(a) Thromboembolism

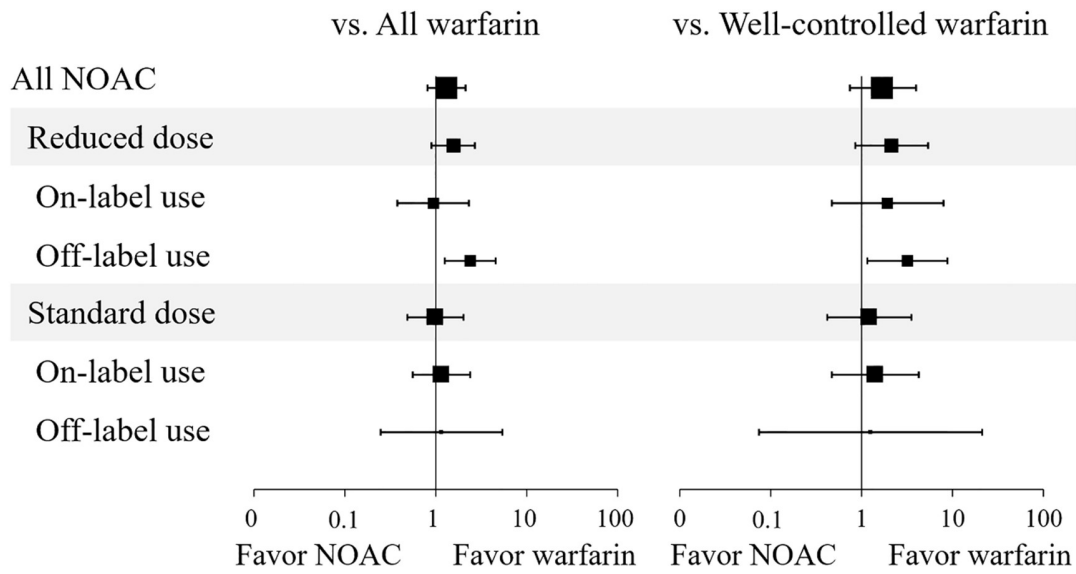

(b) Major bleeding

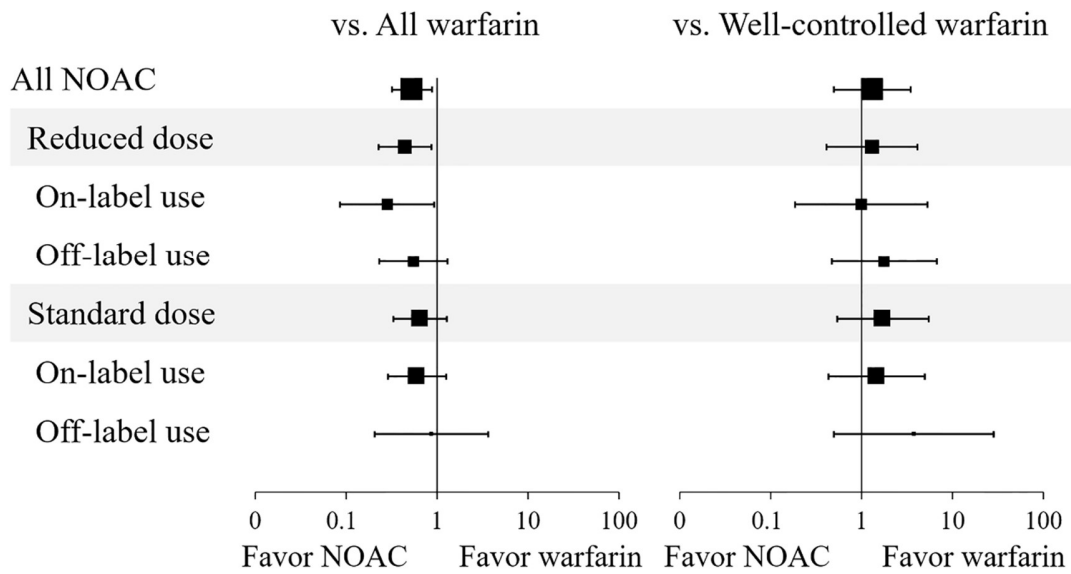

Supplement: 41598_2020_58665_MOESM1_ESM.pdf [file 41598_2020_58665_MOESM1_ESM.pdf]
